# Supplementary material
Source: publisher figshare collection journal article supplement (https://springernature.figshare.com/ndownloader/files/7625491)

## Some molecules and spectra used for training

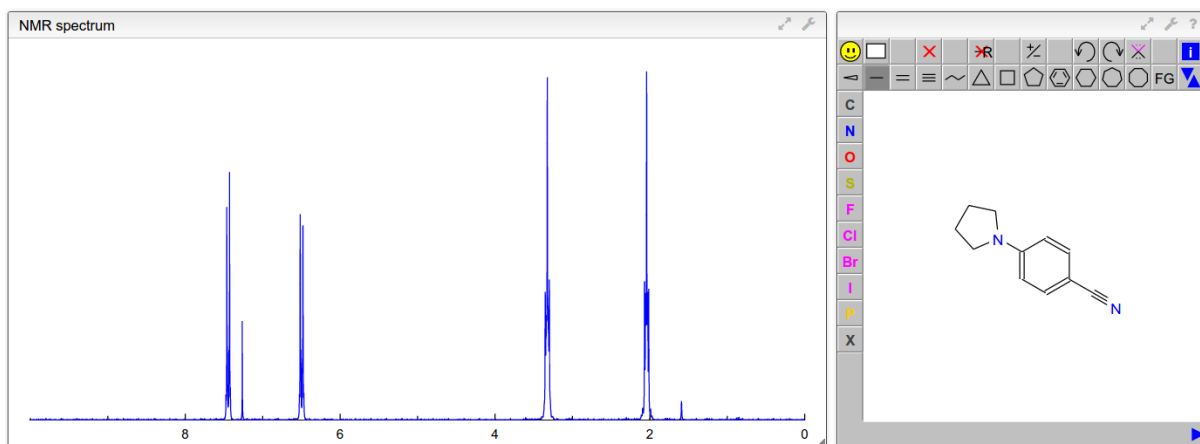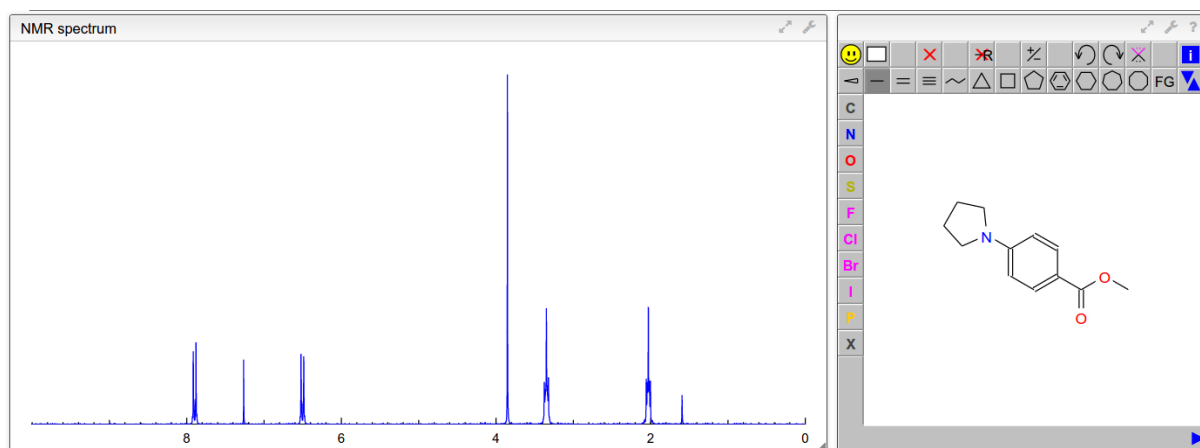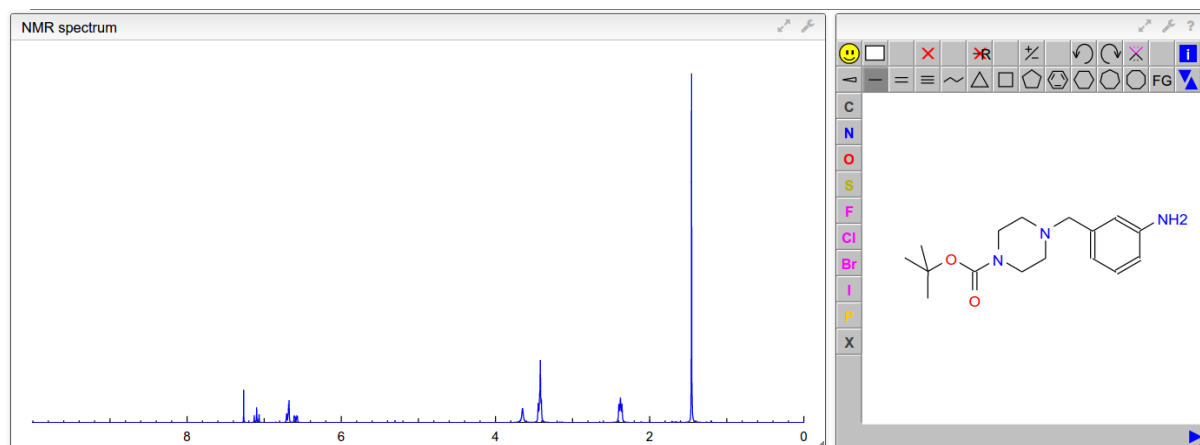



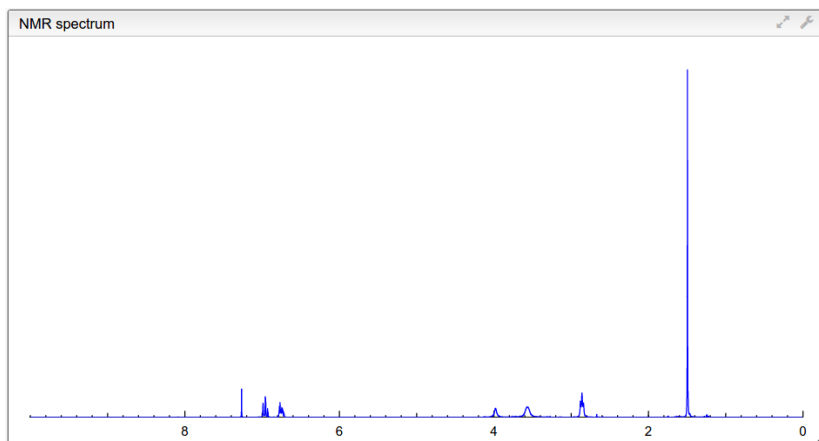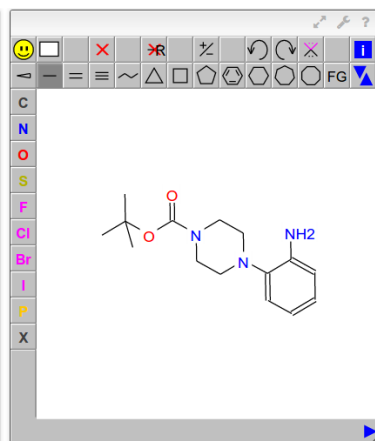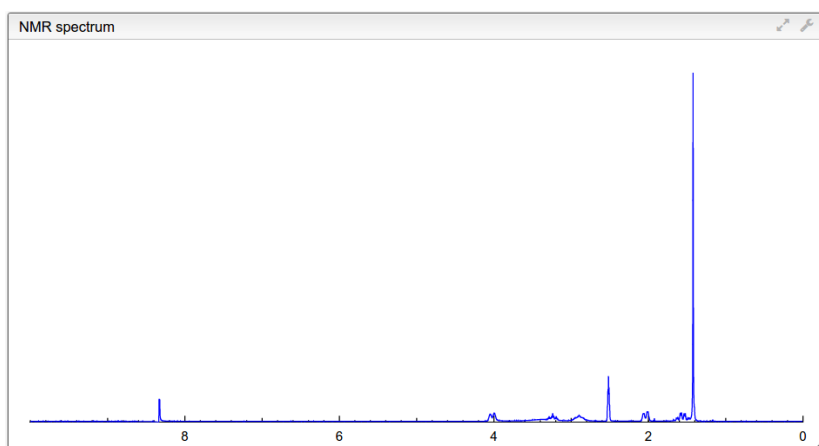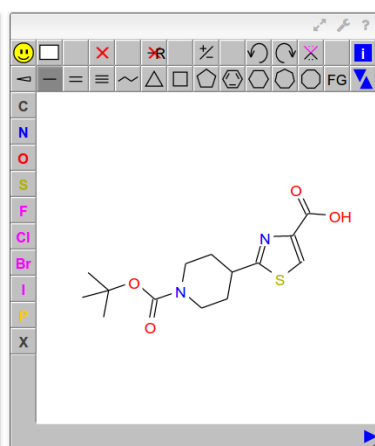

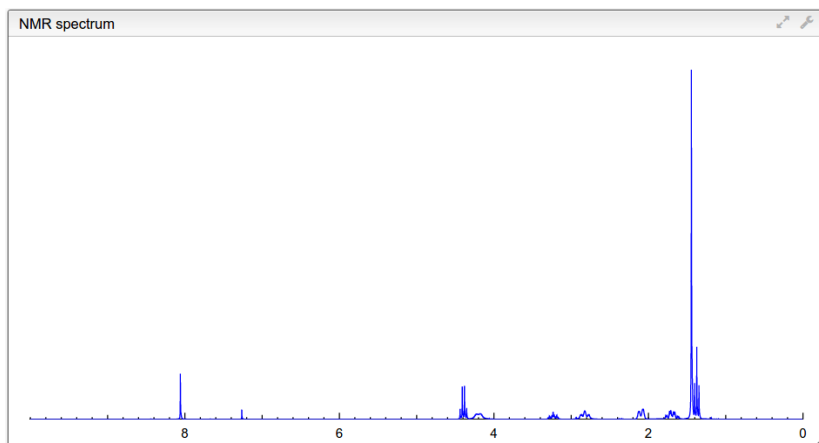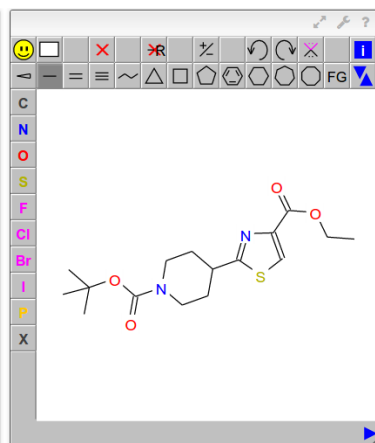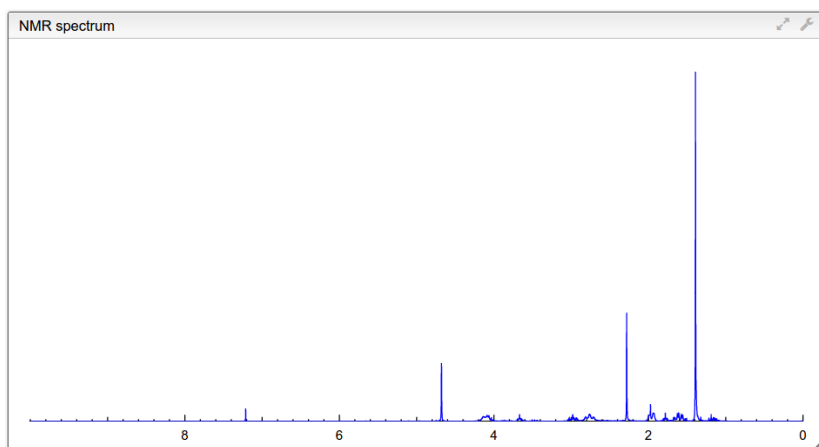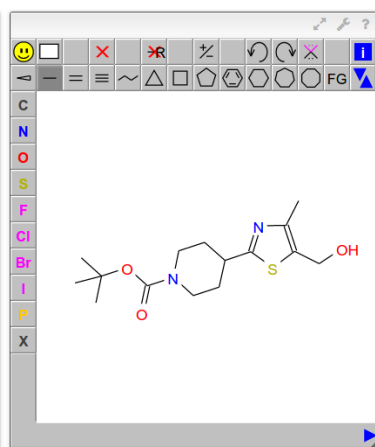

Supplement: Supplementary file [file 7625491]
